# Supplementary material for: Conformational behavior of a semiflexible dipolar chain with a variable relative size of charged groupsviamolecular dynamics simulations
Source: Royal Society of Chemistry journal article supplement (doi:10.1039/c9sm00909d), 2019-01-01
Supplement: c9sm00909d1.pdf [file c9sm00909d1.pdf]

# Conformational behavior of a semiflexible dipolar chain with a variable relative size of charged groups via molecular dynamics simulations.

Yu. D. Gordievskaya and E. Yu. Kramarenko.

## Supporting information.

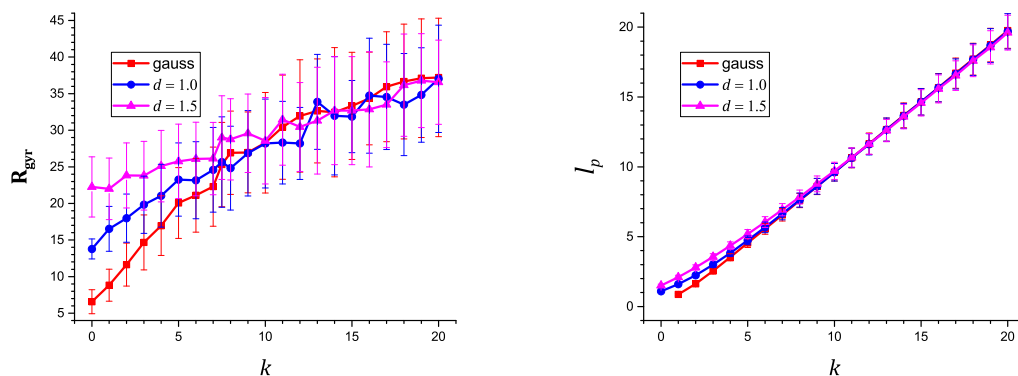

Figure S1. Radius of gyration  $R_{gyr}$  (left) and persistence length  $l_p$  (right) as functions of rigidity  $k$  in the case of the ideal chain (gauss) and for uncharged chains in good solvent with different dipole length  $d = 1.0$  and  $1.5$ .

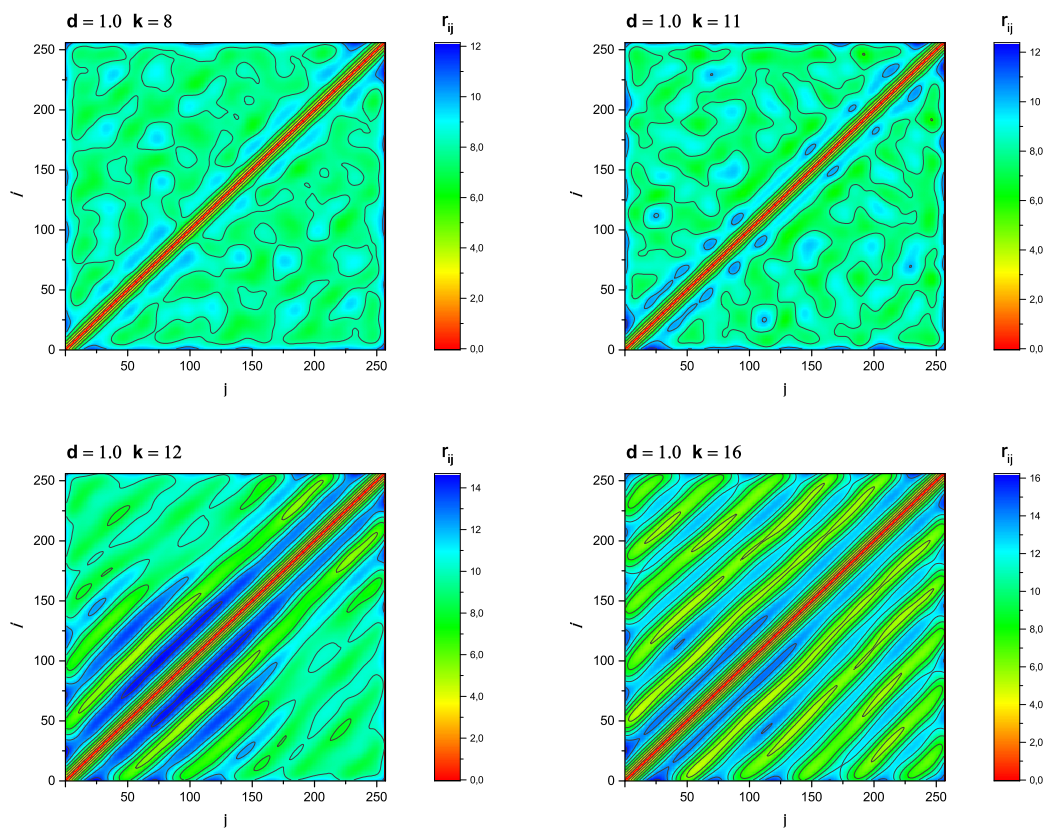

Figure S2. Distance map for backbone units with dipole length  $d = 1$  for different  $k = 8, 11, 12, 16$  at  $\lambda = 10$ .

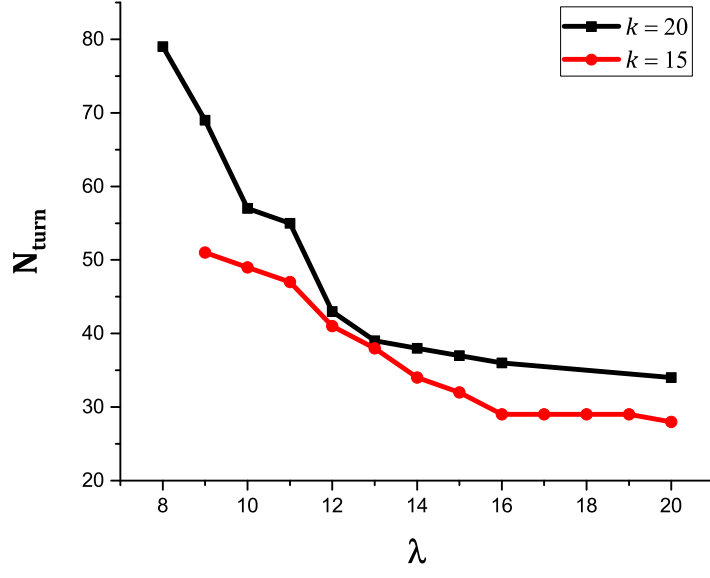

Figure S3. Number of turns of the torus as function of  $\lambda$  at different  $k$  and  $d = 1$

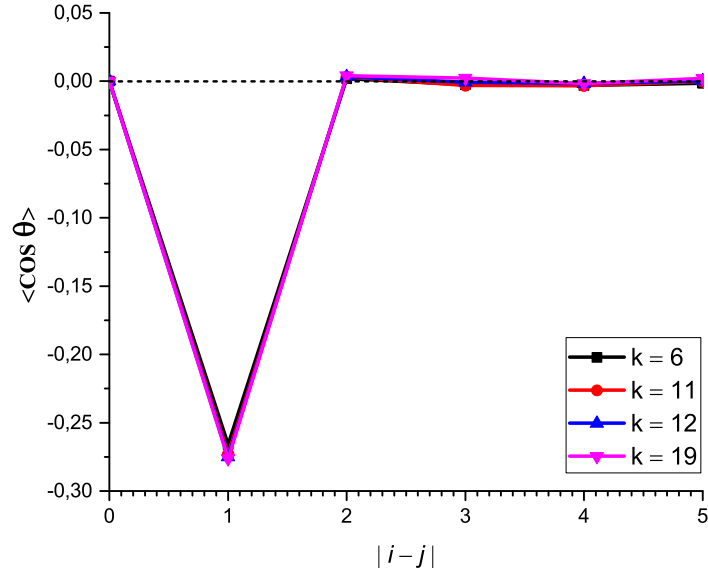

Figure S4. The average cosine between dipoles as function of number along chain for different  $k$  at  $\lambda = 10$  and  $d = 1$ .

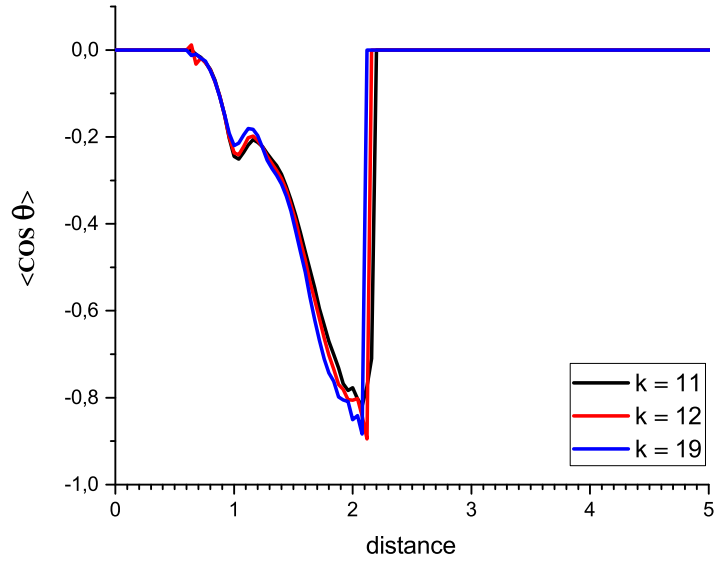

Figure S5. The average cosine between dipoles neighboring along the chain along as function of distance in space for different  $k$  at  $\lambda = 10$  and  $d = 1$  .

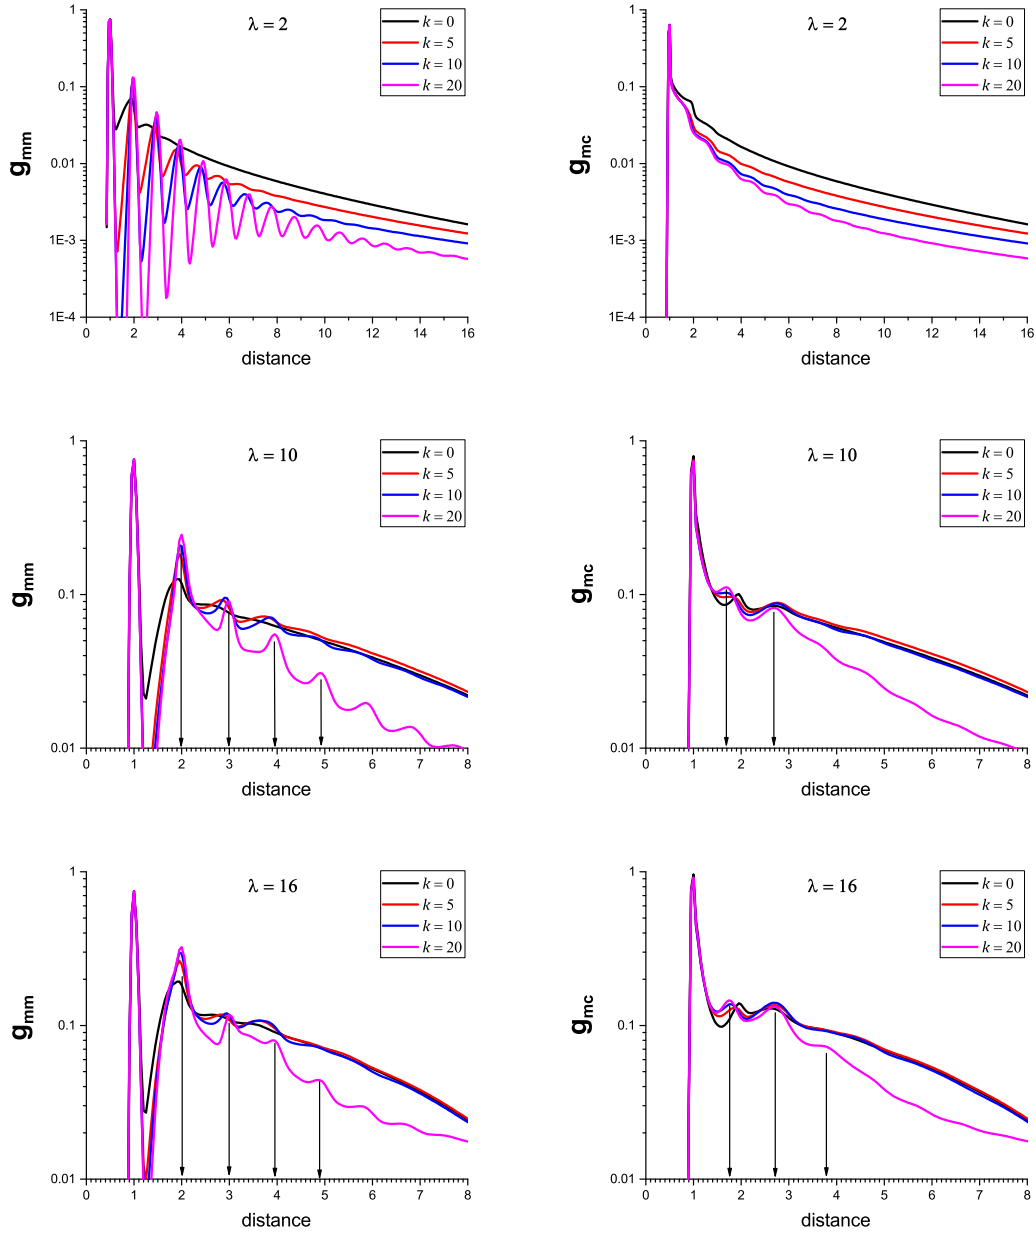

Figure S6. Radial distribution functions of backbone beads relative to each other,  $g_{mm}$ , as well as relative to side beads,  $g_{mc}$ , for different  $\lambda$  and  $k$  at  $d = 1$

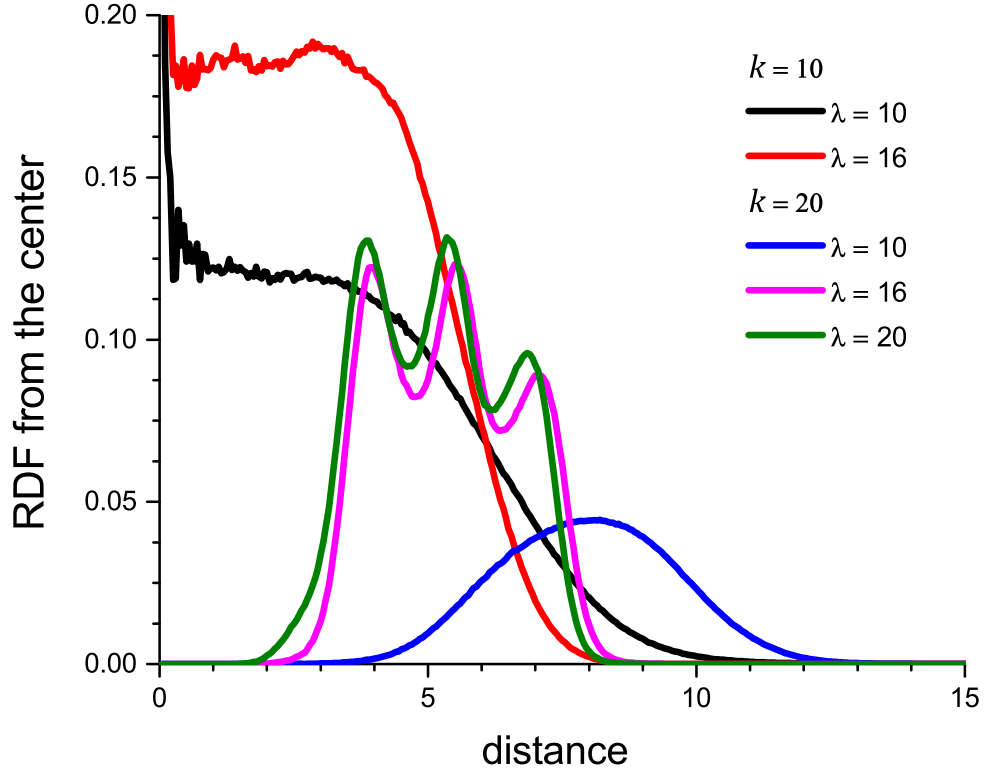

Figure S7. Radial distribution functions of backbone beads relative to the center of mass of the chain for different  $\lambda$  and  $k$  at  $d = 1$

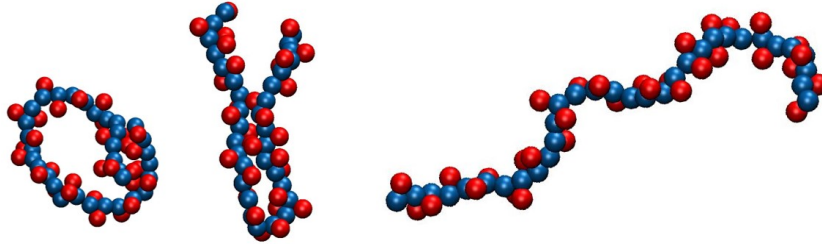

Figure S8. Snapshots of dipolar chain of rigidity  $7 \leq k \leq 14$  at  $\lambda = 10$ ,  $N = 32$ . There are metastable states such as circle, hairpin and extended chain.

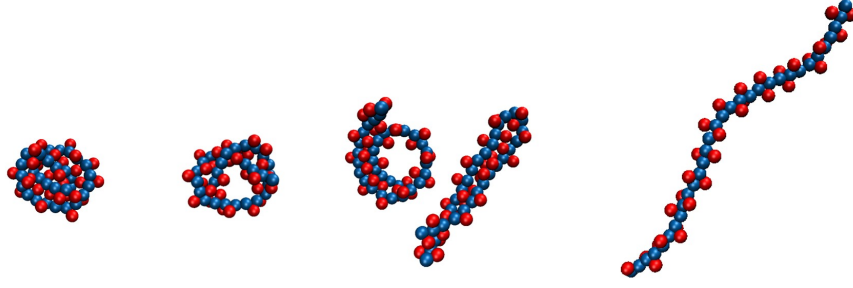

Figure S9. Snapshots of dipolar chain at  $\lambda = 20$ ,  $N = 32$ . There are loose globule ( $k = 15$ ), knots with trefoil knot ( $k = 26$ ), hairpin with short-living torus ( $k = 34$ ) and rod ( $k = 40$ ).

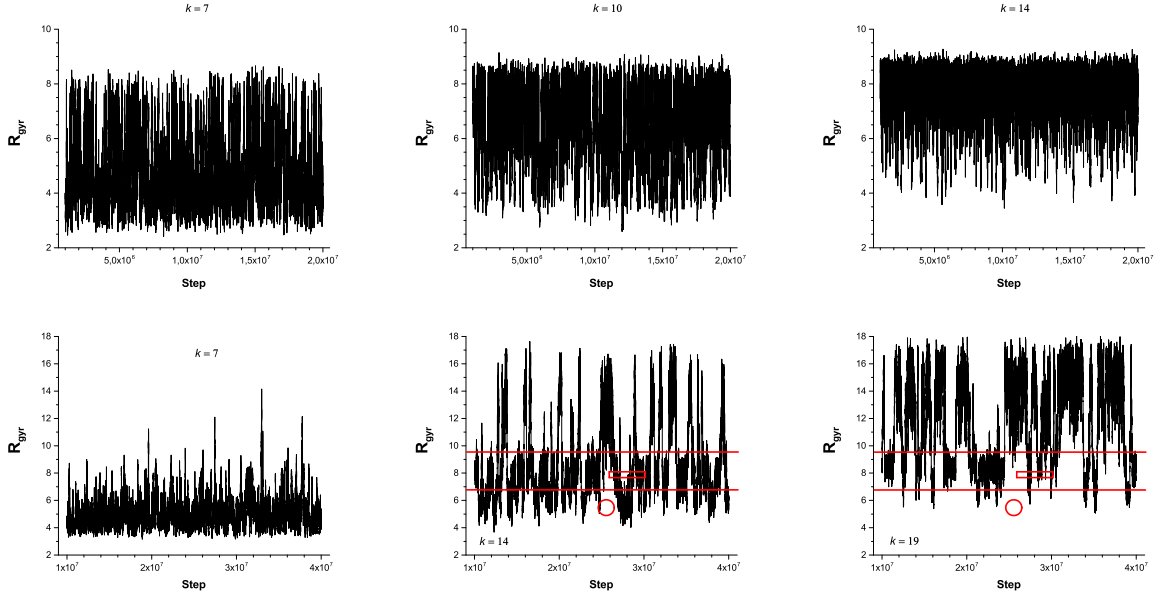

Figure S10. Dynamic exchange between toroidal structure, hairpin and extended chain in a typical run, as seen in the trace of radius of gyration as a function of time for different rigidity at  $\lambda = 10$ . Top:  $N = 32$  and  $k = 7, 10, 14$ . Bottom:  $N = 64$  and  $k = 7, 14, 19$ .

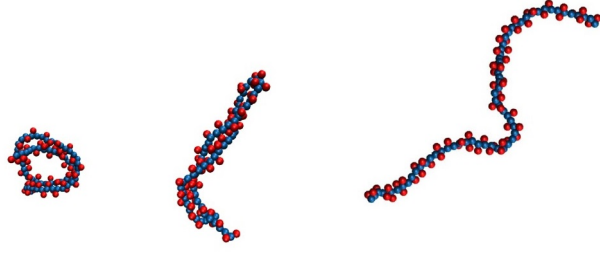

Figure S11. Snapshots of dipolar chain of rigidity  $k = 7, 14, 19$  at  $\lambda = 10$ ,  $N = 64$  .

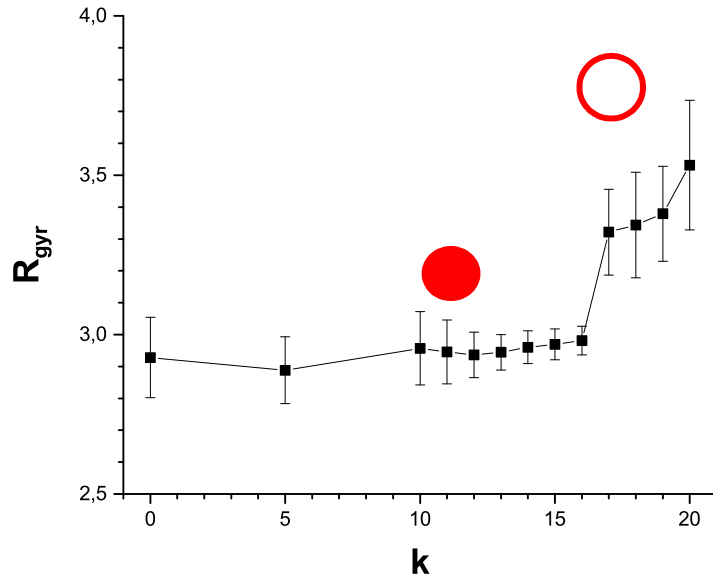

Figure S12. Radius of gyration  $R_{gyr}$  as function of rigidity  $k$  at  $\lambda = 20$ ,  $N = 64$  .

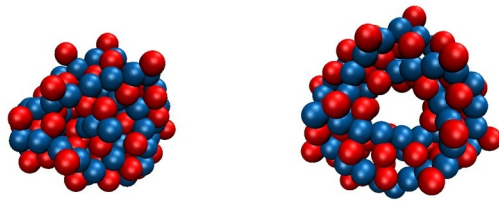

Figure S13. Snapshots of dipolar chain of rigidity  $k = 14, 19$  at  $\lambda = 20$ ,  $N = 64$ . There are globule and torus.



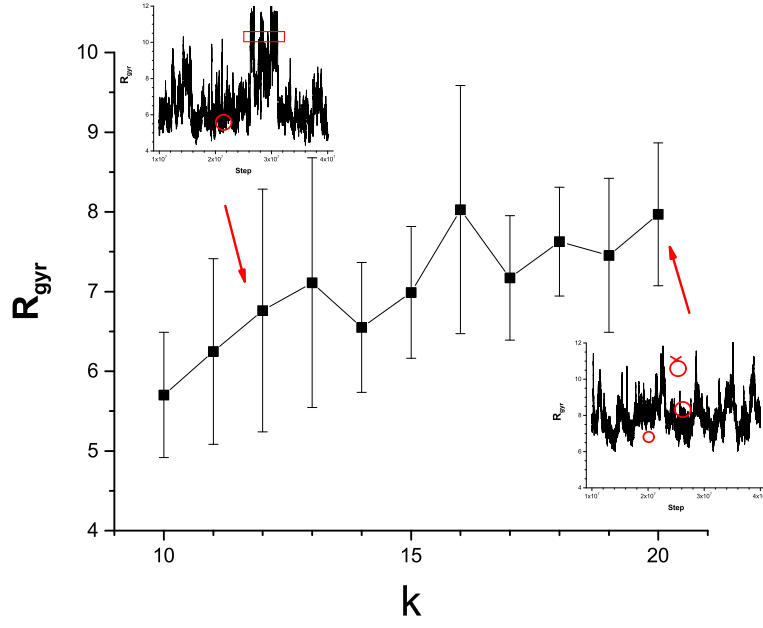

Figure S14. Radius of gyration  $R_{gyr}$  as function of rigidity  $k$  at  $\lambda = 10$ ,  $N = 128$  .

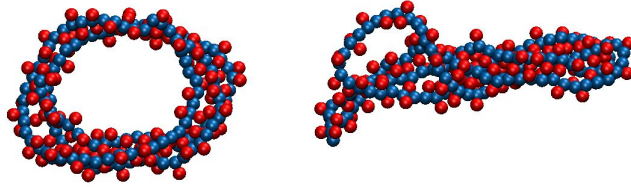

Figure S15. Snapshots of 128-chain for  $11 \leq k \leq 20$  ,  $\lambda = 10$ ,  $d = 1$  .

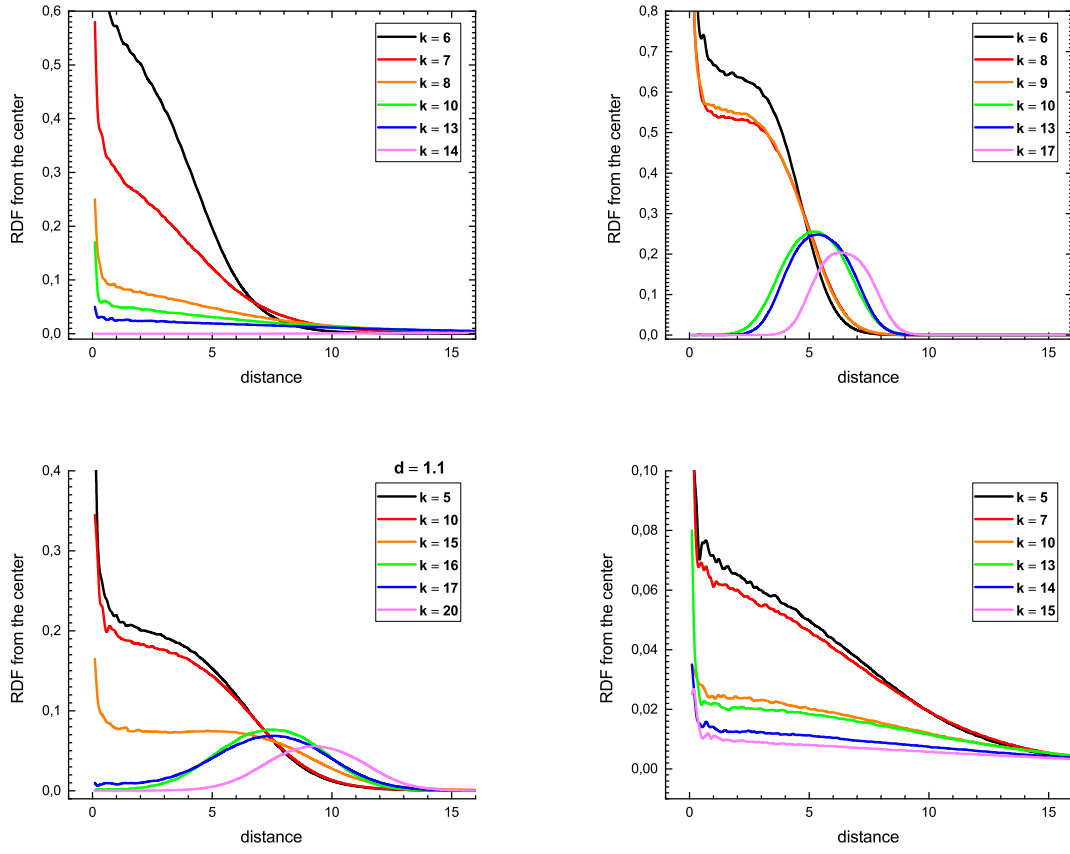

Figure S16. Radial distribution function (density) of backbone units from the center of mass of the chain for different  $k$  at  $\lambda = 10$ . From top to bottom:  $d = 0.6, 0.7, 1.1, 1.2$ .
